# Supplementary material for: AOD: the antioxidant protein database
Source: PubMed Central journal article supplement (PMC5547145; doi:10.1038/s41598-017-08115-6), 2017-08-07
Supplement: 41598_2017_8115_MOESM1_ESM.pdf [file 41598_2017_8115_MOESM1_ESM.pdf]

## Supplementary Materials

### **AOD: the antioxidant protein database** **Pengmian Feng<sup>1</sup>, Hui Ding<sup>2</sup>, Hao Lin<sup>2\*</sup>, Wei Chen<sup>3\*</sup>**

<sup>1</sup> Hebei Province Key Laboratory of Occupational Health and Safety for Coal Industry, School of Public Health, North China University of Science and Technology, Tangshan 063000, China;

<sup>2</sup> Key Laboratory for Neuro-Information of Ministry of Education, School of Life Science and Technology, Center for Informational Biology, University of Electronic Science and Technology of China, Chengdu 610054, China;

<sup>3</sup> Department of Physics, School of Sciences, and Center for Genomics and Computational Biology, North China University of Science and Technology, Tangshan, Tangshan 063000, China.

**\*To whom correspondence should be addressed.**

Hao Lin: [hlin@uestc.edu.cn](mailto:hlin@uestc.edu.cn)

Wei Chen: [gretchchen@ncst.edu.cn](mailto:gretchchen@ncst.edu.cn);

Tel: +86-315 3725715; Fax: +86-315 3725715

**Supplementary Table S1** The Uniprot ID of the antioxidant proteins in AOD that have been reported in previous studies.

|        |        |        |        |        |        |        |        |
|--------|--------|--------|--------|--------|--------|--------|--------|
| A0PSD4 | O04996 | O74887 | P0A251 | P14630 | P28757 | P49114 | P66952 |
| A0QQJ4 | O04997 | O75444 | P0A252 | P14830 | P28758 | P49537 | P66953 |
| A0R1V9 | O08709 | O77834 | P0A4M6 | P14831 | P28782 | P49908 | P66954 |
| A0RBT0 | O08807 | O78310 | P0A5N4 | P15107 | P28783 | P49924 | P69049 |
| A1IGV8 | O08997 | O82089 | P0A5N5 | P15453 | P29427 | P50115 | P70195 |
| A1KLC4 | O09164 | O94561 | P0A608 | P16026 | P29428 | P50116 | P70274 |
| A2BJD9 | O12933 | O95445 | P0A862 | P18122 | P29895 | P50117 | P80174 |
| A2QMY6 | O13851 | P00441 | P0A863 | P18846 | P30041 | P51272 | P80239 |
| A2XGP6 | O14463 | P00442 | P0A864 | P19006 | P30044 | P51547 | P80566 |
| A3DKL1 | O19097 | P00443 | P0A865 | P19007 | P30048 | P52552 | P80732 |
| A4IQF5 | O22287 | P00445 | P0A866 | P19440 | P31307 | P52571 | P80734 |
| A4YYT0 | O22373 | P00446 | P0A9Q7 | P19476 | P31308 | P52572 | P80735 |
| A5ENR3 | O22711 | P00450 | P0AE08 | P19880 | P31725 | P52574 | P80740 |
| A5F3A2 | O24364 | P00738 | P0AE09 | P20108 | P32119 | P53615 | P80864 |
| A6X5N3 | O25151 | P02649 | P0AE10 | P20379 | P33431 | P54407 | P81036 |
| A8A9P0 | O26262 | P02650 | P0AE11 | P20735 | P34227 | P54783 | P81082 |
| A8L1J2 | O29969 | P02662 | P0AE52 | P21762 | P34461 | P54843 | P81163 |
| A8XCP3 | O31687 | P02666 | P0AGD1 | P22217 | P34697 | P54844 | P81269 |
| A9KBI4 | O31699 | P02692 | P0AGD2 | P22233 | P34760 | P55157 | P81361 |
| B0M2T2 | O31820 | P02768 | POC0L2 | P22803 | P34936 | P56597 | P81926 |
| B1W2G7 | O34564 | P03946 | POC0L3 | P23345 | P35160 | P56876 | P82205 |
| B2HD59 | O34777 | P04178 | POC2J8 | P23346 | P35700 | P57005 | P83129 |
| B2SAW2 | O35086 | P05067 | POC5C8 | P23417 | P35704 | P57279 | P83200 |
| B3EWR3 | O35244 | P06702 | POC5C9 | P24669 | P35705 | P57668 | P83233 |
| B6IZ19 | O42666 | P06727 | POC5D0 | P24702 | P36077 | P57790 | P83684 |
| B8GVX4 | O42724 | P06866 | POC5D1 | P24704 | P36214 | P57880 | P84729 |
| C1AQZ5 | O43091 | P07148 | POC5D4 | P24705 | P38013 | P59760 | P85278 |
| C1F4K1 | O43283 | P07314 | POC5D5 | P24706 | P38918 | P59960 | P85978 |
| C3PGV9 | O46412 | P07505 | POC6P9 | P24707 | P40553 | P60052 | P86215 |
| C4LJ26 | O54968 | P07509 | POCB50 | P25236 | P40554 | P61851 | P86241 |
| D0EYG3 | O55234 | P07632 | POCV91 | P25325 | P40581 | P61852 | P86919 |
| D0ZW85 | O58966 | P08226 | POCW86 | P25713 | P41962 | P61854 | P91883 |
| D2HKB0 | O59858 | P08228 | P10791 | P25788 | P41963 | P63300 | P91938 |
| E7FB98 | O59924 | P08294 | P10792 | P25842 | P41973 | P63301 | P93407 |
| E8XDJ8 | O65768 | P09212 | P11418 | P26830 | P42365 | P63302 | P95855 |
| G3ETQ2 | O66602 | P09670 | P11428 | P27005 | P42366 | P63303 | P95895 |
| G3ETQ3 | O66780 | P09678 | P11964 | P27082 | P43787 | P63345 | P97532 |
| G3F828 | O67024 | P09936 | P12710 | P27170 | P46309 | P65633 | P99029 |
| O00244 | O67149 | P0A0B5 | P13635 | P28343 | P46418 | P66004 | P99074 |
| O00522 | O68901 | P0A0B6 | P13926 | P28492 | P48506 | P66826 | P99146 |
| O04005 | O69649 | P0A0B7 | P14312 | P28755 | P48822 | P66827 | P99999 |

| Supplementary Table S1 continued |        |        |        |        |        |        |
|----------------------------------|--------|--------|--------|--------|--------|--------|
| Q00637                           | Q49126 | Q5VAN1 | Q6URB0 | Q8HXQ4 | Q96A56 | Q9M7T0 |
| Q01137                           | Q49UT8 | Q5YT53 | Q71Z84 | Q8K9W0 | Q96VL0 | Q9MB35 |
| Q02610                           | Q49YE4 | Q5ZI34 | Q72NR4 | Q8KBN8 | Q96XS5 | Q9N0V4 |
| Q02BZ5                           | Q4FP21 | Q5ZJF4 | Q73B22 | Q8KED5 | Q974S8 | Q9NL98 |
| Q03247                           | Q4L376 | Q5ZKS8 | Q73RS4 | Q8L5E0 | Q979N7 | Q9PPE0 |
| Q04120                           | Q4L754 | Q5ZT17 | Q73ZL4 | Q8LBK6 | Q97E14 | Q9QXE4 |
| Q04JB8                           | Q500Y9 | Q60692 | Q74NC6 | Q8N573 | Q98SV0 | Q9R063 |
| Q06830                           | Q50232 | Q60795 | Q751L8 | Q8NRG3 | Q98SV1 | Q9R1P4 |
| Q06892                           | Q50416 | Q60928 | Q75SY5 | Q8NW51 | Q99497 | Q9RU48 |
| Q07182                           | Q50441 | Q61147 | Q7AKI6 | Q8PYP6 | Q99J99 | Q9SDD6 |
| Q07449                           | Q51853 | Q61171 | Q7BHK8 | Q8R844 | Q99LX0 | Q9SRZ4 |
| Q07796                           | Q54G70 | Q61646 | Q7F8S5 | Q8RCY5 | Q99MH5 | Q9TT99 |
| Q08420                           | Q54GP3 | Q61985 | Q7G959 | Q8SPS7 | Q99MS3 | Q9UI32 |
| Q0BUC5                           | Q54PZ2 | Q63716 | Q7M1R5 | Q8SS85 | Q9A268 | Q9URV9 |
| Q0BXT2                           | Q54RN1 | Q63DQ8 | Q7RTV5 | Q8U218 | Q9AGW2 | Q9USR1 |
| Q0D840                           | Q54RQ1 | Q64405 | Q7XPE8 | Q8VWJ1 | Q9ANL0 | Q9UT98 |
| Q0DRV6                           | Q54TU5 | Q65HX8 | Q80YE2 | Q8WNN6 | Q9AU11 | Q9UZV4 |
| Q0RH96                           | Q54TW8 | Q684M4 | Q81FU5 | Q8XVP0 | Q9BQE4 | Q9V3P0 |
| Q10252                           | Q55060 | Q694A3 | Q81SZ9 | Q8Y6U8 | Q9BRX8 | Q9VNT5 |
| Q10801                           | Q555L5 | Q69TY4 | Q82IC5 | Q8YCF2 | Q9BYN0 | Q9VX10 |
| Q12548                           | Q55624 | Q6AXX6 | Q83BM5 | Q8Z7A8 | Q9C0N4 | Q9WUC4 |
| Q13162                           | Q55GQ5 | Q6B4U9 | Q877B5 | Q8ZE42 | Q9C5R8 | Q9WZR4 |
| Q14145                           | Q56461 | Q6C662 | Q89AS1 | Q8ZP65 | Q9CBI6 | Q9X5V1 |
| Q15165                           | Q56YN3 | Q6CPE2 | Q8AV19 | Q8ZPS6 | Q9CR58 | Q9XEX2 |
| Q16236                           | Q57109 | Q6EEV6 | Q8CMQ2 | Q90023 | Q9CYH2 | Q9XT28 |
| Q1IJ49                           | Q571F8 | Q6EQG2 | Q8CS58 | Q90384 | Q9D1A0 | Q9Y5Z9 |
| Q21824                           | Q57549 | Q6ER94 | Q8CXF3 | Q91191 | Q9D975 | Q9Y7F0 |
| Q26695                           | Q578J2 | Q6FWL5 | Q8DUK3 | Q92338 | Q9DC60 | Q9Y8D9 |
| Q27666                           | Q58146 | Q6G8L4 | Q8DZH0 | Q923X4 | Q9FGS4 | Q9Y9L0 |
| Q28502                           | Q59081 | Q6GC91 | Q8E536 | Q92BC5 | Q9FK60 | Q9Z0V5 |
| Q2FJN4                           | Q59452 | Q6GFZ4 | Q8EPB7 | Q949U7 | Q9FR35 | Q9Z0V6 |
| Q2G282                           | Q59623 | Q6GJR7 | Q8F7T2 | Q94BT9 | Q9FWR4 | Q9Z1R3 |
| Q2QL34                           | Q59689 | Q6HL81 | Q8FQH8 | Q95079 | Q9H2X6 | Q9Z2X8 |
| Q2YKW2                           | Q5E947 | Q6L140 | Q8FVW4 | Q95081 | Q9HEY7 | Q9ZKE7 |
| Q2YVK2                           | Q5HF61 | Q6L240 | Q8GY89 | Q95085 | Q9HJL3 | Q9ZUU2 |
| Q39172                           | Q5HIR5 | Q6LY19 | Q8HXP8 | Q95086 | Q9HKX0 |        |
| Q39173                           | Q5HJN2 | Q6NGT4 | Q8HXP9 | Q95087 | Q9JKY1 |        |
| Q3J6L0                           | Q5HRY1 | Q6PBP3 | Q8HXQ0 | Q95088 | Q9K813 |        |
| Q3KTM2                           | Q5JF30 | Q6QPJ6 | Q8HXQ1 | Q95095 | Q9KCJ4 |        |
| Q42564                           | Q5KXL9 | Q6S5J6 | Q8HXQ2 | Q96291 | Q9L3Q5 |        |
